# Supplementary material for: Persistence of immunity in children immunised with 13-valent pneumococcal conjugate vaccine and impact on nasopharyngeal carriage: a cross-sectional study
Source: PubMed Central journal article supplement — Thorax. 2020 May 22;75(8):689–92. doi: 10.1136/thoraxjnl-2019-213878 (PMC7402562; doi:10.1136/thoraxjnl-2019-213878), 2020-05-22
Supplement: thoraxjnl-2019-213878supp001.pdf [file thoraxjnl-2019-213878supp001.pdf]

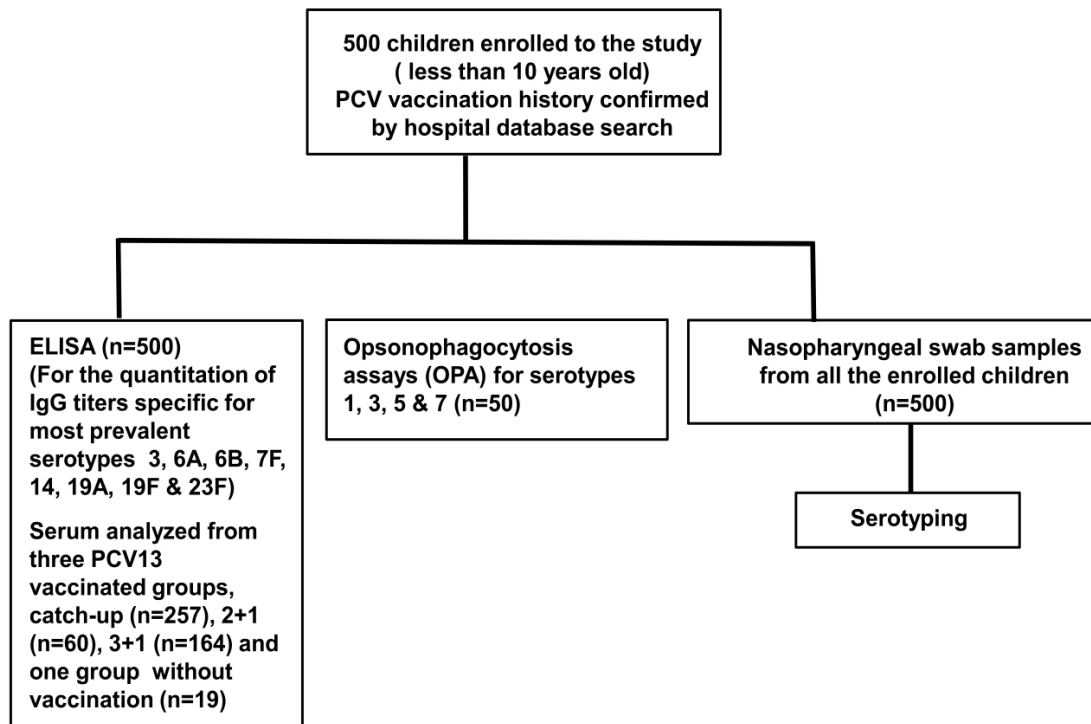

**Supplementary figure S1** Flow diagram of the study. We enrolled 500 children less than 10 years old after PCV13 vaccination in different schedules for immunogenicity and nasopharyngeal pneumococcal carriage assay.
