# Supplementary material for: Persistence of immunity in children immunised with 13-valent pneumococcal conjugate vaccine and impact on nasopharyngeal carriage: a cross-sectional study
Source: PubMed Central journal article supplement — Thorax. 2020 May 22;75(8):689–92. doi: 10.1136/thoraxjnl-2019-213878 (PMC7402562; doi:10.1136/thoraxjnl-2019-213878), 2020-05-22
Supplement: thoraxjnl-2019-213878supp003.pdf [file thoraxjnl-2019-213878supp003.pdf]

1 **Persistence of Immunity in Children Immunized with 13-Valent Pneumococcal**  
2 **Conjugate Vaccine and Impact on Nasopharyngeal Carriage: A Cross-Sectional**  
3 **Study**

4 Rajendra-Prasad Janapatla,<sup>1</sup> Mei-Hua Hsu,<sup>1</sup> Chyi-Liang Chen,<sup>1</sup> Sung-Hsi Wei,<sup>2,3</sup>

5 Ming-Jia Yu,<sup>1</sup> Lin-Hui Su,<sup>1</sup> Tzou-Yien Lin,<sup>4,5</sup> and Cheng-Hsun Chiu<sup>1,4,5</sup>

6 <sup>1</sup>Molecular Infectious Disease Research Center, Chang Gung Memorial Hospital,  
7 Taoyuan, Taiwan

8 <sup>2</sup>Central Regional Center, Centers for Disease Control, Taichung, Taiwan

9 <sup>3</sup>Department of Public Health, China Medical University, Taichung, Taiwan

10 <sup>4</sup>Division of Pediatric Infectious Diseases, Department of Pediatrics, Chang Gung  
11 Memorial Hospital, Taoyuan, Taiwan

12 <sup>5</sup>Graduate Institute of Biomedical Sciences, Chang Gung University College of  
13 Medicine, Taoyuan, Taiwan

14

15 **Correspondence to** Prof. Cheng-Hsun Chiu, M.D., Ph.D., Division of Pediatric  
16 Infectious Diseases, Department of Pediatrics, Chang Gung Memorial Hospital, No. 5,  
17 Fu-Hsin Street, Kweishan 333, Taoyuan, Taiwan; [chchiu@adm.cgmh.org.tw](mailto:chchiu@adm.cgmh.org.tw)

18

19

## 1 SUPPLEMENTARY MATERIALS AND METHODS

### 2 Study Design

3 This cross-sectional study enrolled 500 children aged  $\leq 10$  years of age who were  
4 previously administered one to four doses of PCV13 according to different schedules  
5 in 2016-2017. PCV13 (Pevnar 13®; Pfizer, USA) was stored refrigerated at 2-8  
6 degrees C (36-46 degrees F) until used. A single blood sample was drawn from enrolled  
7 children and sera was separated from blood samples and frozen at  $-80^{\circ}\text{C}$  until analysis.  
8 The 500 children were divided into 4 groups based on each serotype studied: Catch-up  
9 (1-2 doses of each polysaccharide antigen received, n=257), 2+1 (n=60), 3+1 (n=164)  
10 and those without vaccination (n=19) (supplementary figure S1 and supplementary  
11 table S1). In the 2 + 1 schedule, 2 primary doses were given at 2 and 4 months of age,  
12 followed by a booster between 12-15 months of age. For 3 + 1 schedule, 3 primary  
13 doses were administered at 2, 4, 6 and a booster at 12-15 months. Catch-up  
14 immunization was done with a single dose of PCV13 to children 2 to 5 years of age or  
15 with 2 doses of PCV13 for children between 12 and 24 months of age. Before the  
16 enrollment in the study, children attending general pediatric clinics were screened for  
17 eligibility; vaccination status and dates were obtained from vaccination record book  
18 and confirmed by hospital electronic health record database. Nasopharyngeal swabs  
19 were collected from the 500 children immediately after blood sampling.

20

### 21 Immunogenicity Assessment and Opsonophagocytosis Assay

22 Immunoglobulin G (IgG) antibody titers specific for eight serotypes (3, 6A, 6B, 7F, 14,  
23 19A, 19F and 23F) were determined by enzyme-linked immunosorbent assay (ELISA)  
24 using the international reference serum 007sp.<sup>1</sup> Pneumococcal infections due to PCV13  
25 serotypes 1, 4, 5, 9V and 18C are rare (<4 infections from 2012-2014) in this region;

1 therefore IgG concentrations of those five serotypes were not analyzed in this study.  
2 Approximately 5 mL of blood collected by venipuncture, separated and serum stored  
3 at  $-80^{\circ}\text{C}$ . The standard ELISA was performed at the Molecular Infectious Diseases  
4 Research Center at Chang Gung Memorial Hospital. Briefly, each well of a 96-well  
5 medium binding microtiter plate (Corning, Inc., Corning, Taiwan) was coated with 100  
6  $\mu\text{L}$  of a serotype-specific pneumococcal polysaccharide antigen (American Type  
7 Culture Collection, Manassas, VA, USA) diluted to a predetermined concentration, and  
8 plates were incubated at  $37^{\circ}\text{C}$  for 5 h in a humidified chamber. The coated plates were  
9 washed with 1X Tris-buffered saline with 0.01% Brij 35 solution. Test sera were  
10 preabsorbed with cell wall polysaccharide (Statens Serum Institut, Copenhagen,  
11 Denmark) and 22F polysaccharide (ATCC), and the reference  
12 standard 007sp (provided by Carl Frasch, Center for Biologics Evaluation and  
13 Research, Food and Drug Administration, Bethesda, MD, USA) was pre-absorbed with  
14 cell wall polysaccharide. Sera were serially diluted 2.5-fold in absorption solution and  
15 incubated at room temperature for 30 min. After incubation, the sera (50  $\mu\text{L}$ ) were  
16 transferred to the coated microtiter plates, and the plates were incubated for 2 h at room  
17 temperature. The plates were washed three times, and 100  $\mu\text{L}$  of diluted alkaline  
18 phosphatase-conjugated goat anti-human immunoglobulin G (IgG; Southern Bio- tech,  
19 Birmingham, AL, USA) was added to each well. After a 2-h incubation, the plates were  
20 washed three times, and 100  $\mu\text{L}$  of substrate solution (diethanolamine [Sigma, MO,  
21 USA] with 1 mg/mL of *p*-nitrophenyl phosphate powder [Sigma]) was added to each  
22 well. After a 2-h incubation at room temperature, 50  $\mu\text{L}$  of 3 M NaOH was added to all  
23 wells to stop the enzyme reaction. After 30 minutes, read optical density values at 405  
24 nm and 650 nm on a Spectramax plate reader, with Softmax Pro software (Molecular  
25 Devices, USA). Optical densities from SoftMax Pro software were converted to

1 antibody concentrations using Excel spreadsheet. The lower limit of assay  
2 quantification was 0.15 µg/mL and IgG concentrations of 0.35 µg/mL or higher were  
3 considered protective.

4 In a subset of 50 sera, opsonophagocytic activity was determined for serotypes 1,  
5 3, 5, and 19A by multiplex Opsonophagocytosis assay (OPA) at the WHO Reference  
6 Laboratory, University College London Institute of Child Health (London, UK). Values  
7 are expressed as an opsonophagocytic assay titer (OPA, titer  $\geq 1 : 8$  considered positive),  
8 equivalent to the reciprocal of the serum dilution required to produce 50% killing of  
9 the relevant serotype.<sup>2</sup>

10 The immunogenicity endpoints for the study were the anti-pneumococcal  
11 polysaccharide IgG geometric mean concentrations (GMCs) and OPA geometric mean  
12 titers (GMTs) to 8 major PCV13 serotypes and proportion of subjects with IgG  
13 concentration of  $\geq 0.35$  µg/mL (responders).<sup>3</sup>

#### 14 **Statistical Analysis**

15 All the analyses were performed using SPSS Statistics 20 (SPSS Inc., Chicago, IL, USA)  
16 and SAS ver. 9.4 (SAS Institute Inc., Cary, NC, USA). GMCs were compared by a one-  
17 way analysis of variance (ANOVA) with Scheffe's post hoc test and 2-sample t-test.  
18 Linear regression analyses was performed to assess the persistence of anti-CPS IgG  
19 post-PCV13 vaccination, correlation between the serum IgG (µg/mL) and time (years)  
20 was evaluated by a Pearson correlation coefficient ( $r$ ).<sup>4,5</sup> The association between  
21 nasopharyngeal point-prevalence and pneumococcal IgG concentration for each  
22 serotype studied was assessed from a logistic regression model using nasopharyngeal  
23 carriage rate reduction (dependent variable) as a function of the IgG concentrations  
24 (independent variable). Point-prevalence was defined as detection of a given serotype  
25 in vaccinated children; the NP point-prevalence rate describes the number of serotypes

1 detected relative to the total number of subjects. The predicted changes in point-  
2 prevalence nasopharyngeal carriage rate corresponding to the antibody concentration  
3 threshold of  $\geq 0.35$   $\mu\text{g/mL}$  and to selected percentiles of IgG concentration were  
4 calculated for the total population.<sup>5</sup> Predicted acquisition rates correspond to the 25th  
5 to 90th percentiles of the observed IgG concentrations. Odds ratios (OR) and the  
6 corresponding 95% confidence intervals (CI) were calculated from the logistic  
7 regression models.

8

## 9 **References**

- 10 1. Goldblatt D, Plikaytis BD, Akkoyunlu M, et al. Establishment of a new human  
11 pneumococcal standard reference serum, 007sp. *Clin Vaccine Immunol*  
12 2011;18:1728-36.
- 13 2. Burton RL, Nahm MH. Development and validation of a fourfold multiplexed  
14 opsonization assay (MOPA4) for pneumococcal antibodies. *Clin Vaccine Immunol*  
15 2006;13:1004-9.
- 16 3. Huang LM, Lin TY, Juergens C. Immunogenicity and safety of a 13- valent  
17 pneumococcal conjugate vaccine given with routine pediatric vaccines in Taiwan.  
18 *Vaccine* 2012;30:2054-9.
- 19 4. Elias J, Findlow J, Borrow R, et al. Persistence of antibodies in laboratory staff  
20 immunized with quadrivalent meningococcal polysaccharide vaccine. *J Occup*  
21 *Med Toxicol* 2013;8:4.
- 22 5. Dagan R, Juergens C, Trammel J, et al. Modeling pneumococcal nasopharyngeal  
23 acquisition as a function of anticapsular serum antibody concentrations after  
24 pneumococcal conjugate vaccine administration. *Vaccine* 2016;34:4313-20.
