# Supplementary material for: Persistence of immunity in children immunised with 13-valent pneumococcal conjugate vaccine and impact on nasopharyngeal carriage: a cross-sectional study
Source: PubMed Central journal article supplement — Thorax. 2020 May 22;75(8):689–92. doi: 10.1136/thoraxjnl-2019-213878 (PMC7402562; doi:10.1136/thoraxjnl-2019-213878), 2020-05-22
Supplement: thoraxjnl-2019-213878supp005.pdf [file thoraxjnl-2019-213878supp005.pdf]

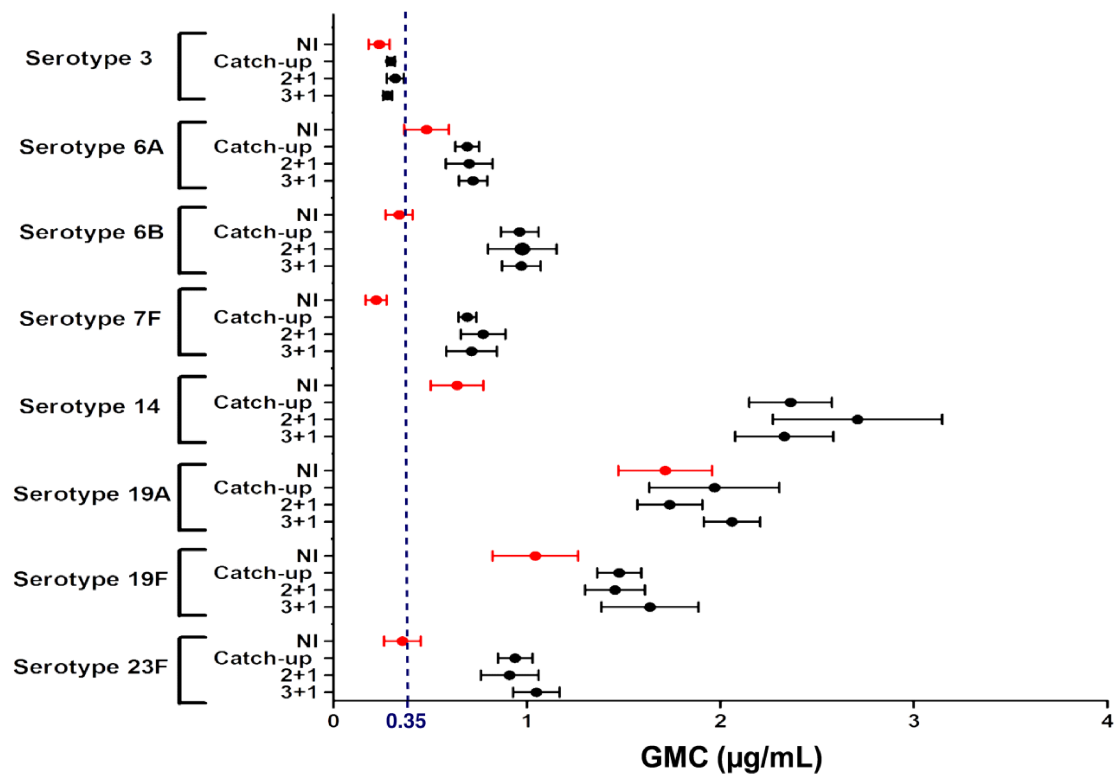

**Supplementary figure S2** Pneumococcal serotype-specific IgG (geometric mean concentrations with 95% CI, µg/ml) in children after PCV13 vaccination with catch-up (1-2 doses), 2+1, and 3+1 schedules. NI represents non-immunized children group.
