# Supplementary material for: Persistence of immunity in children immunised with 13-valent pneumococcal conjugate vaccine and impact on nasopharyngeal carriage: a cross-sectional study
Source: PubMed Central journal article supplement — Thorax. 2020 May 22;75(8):689–92. doi: 10.1136/thoraxjnl-2019-213878 (PMC7402562; doi:10.1136/thoraxjnl-2019-213878), 2020-05-22
Supplement: thoraxjnl-2019-213878supp006.pdf [file thoraxjnl-2019-213878supp006.pdf]

**Supplementary table S3** Comparison of Pneumococcal Serotype-Specific IgG (Geometric Mean Concentrations with 95% CI,  $\mu\text{g/ml}$ ) between Two Time Points Following Immunization (0-2 Years vs. 4-6 Years) and Percentage of Children with IgG Level of  $\geq 0.35 \mu\text{g/ml}$  in Children with Catch-Up (1-2 doses), 2+1 and 3+1 Schedules

| PCV13 Catch-up |                                   |                                      |                                   |                                      |                             |                             |
|----------------|-----------------------------------|--------------------------------------|-----------------------------------|--------------------------------------|-----------------------------|-----------------------------|
| Serotype       | 0-2 years<br>GMC $\mu\text{g/ml}$ | %<br>$\geq 0.35$<br>$\mu\text{g/ml}$ | 4-6 years<br>GMC $\mu\text{g/ml}$ | %<br>$\geq 0.35$<br>$\mu\text{g/ml}$ | <i>P</i> value <sup>a</sup> | <i>P</i> value <sup>b</sup> |
| <b>3</b>       | 0.30 (0.24-0.38)                  | 43.1                                 | 0.26 (0.21-0.33)                  | 32.5                                 | 0.148                       | 0.212                       |
| <b>6A</b>      | 0.89 (0.61-1.30)                  | 76.5                                 | 0.68 (0.50-0.92)                  | 62.3                                 | 0.231                       | 0.330                       |
| <b>7F</b>      | 0.90 (0.69-1.17)                  | 82.4                                 | 0.65 (0.53-0.81)                  | 75.3                                 | <b>0.038</b>                | 0.420                       |
| <b>19A</b>     | 1.49 (1.13-1.97)                  | 98.0                                 | 2.33 (1.79- 302)                  | 97.4                                 | <b>0.031</b>                | <b>0.050</b>                |
| <b>6b</b>      | 1.24 (0.77-2.01)                  | 73.3                                 | 0.98 (0.72-1.34)                  | 71.3                                 | 0.290                       | 0.428                       |
| <b>14</b>      | 3.50 (2.36-5.17)                  | 100                                  | 2.14 (0.65-2.77)                  | 93.3                                 | 0.061                       | 0.215                       |
| <b>19F</b>     | 1.48 (1.01-2.17)                  | 95.6                                 | 1.49 (1.16-1.90)                  | 86.7                                 | 0.947                       | 0.671                       |
| <b>23F</b>     | 0.76 (0.55-1.04)                  | 82.2                                 | 1.08 (0.80-1.45)                  | 97.9                                 | 0.599                       | <b>0.048</b>                |
| PCV13 2+1      |                                   |                                      |                                   |                                      |                             |                             |
| Serotype       | 0-2 years<br>GMC $\mu\text{g/ml}$ | %<br>$\geq 0.35$<br>$\mu\text{g/ml}$ | 4-6 years<br>GMC $\mu\text{g/ml}$ | %<br>$\geq 0.35$<br>$\mu\text{g/ml}$ | <i>P</i> value <sup>a</sup> | <i>P</i> value <sup>b</sup> |
| <b>3</b>       | 0.44 (0.29-0.67)                  | 60.0                                 | 0.29 (0.21-0.40)                  | 33.3                                 | 0.414                       | 0.531                       |
| <b>6A</b>      | 1.24 (0.79-1.97)                  | 95.0                                 | 0.40 (0.28-0.58)                  | 61.1                                 | <b>0.011</b>                | 0.141                       |
| <b>7F</b>      | 1.33 (0.90-1.95)                  | 95.0                                 | 0.39 (0.26-0.57)                  | 61.1                                 | <b>0.003</b>                | 0.058                       |
| <b>19A</b>     | 1.58 (1.06-2.51)                  | 95.0                                 | 2.68 (1.62-4.43)                  | 100                                  | <b>0.049</b>                | 0.482                       |
| <b>6b</b>      | 1.63 (1.04-2.53)                  | 100                                  | 0.52 (0.28-0.95)                  | 54.5                                 | <b>0.001</b>                | 0.476                       |
| <b>14</b>      | 4.65 (2.96-7.26)                  | 100                                  | 1.98 (1.24-3.14)                  | 100                                  | <b>0.025</b>                | 0.067                       |
| <b>19F</b>     | 1.76 (1.22-2.54)                  | 100                                  | 1.52 (0.84-2.72)                  | 86.4                                 | 0.324                       | 0.266                       |
| <b>23F</b>     | 1.12 (0.74-1.69)                  | 86.9                                 | 0.91 (0.52-1.60)                  | 77.3                                 | 0.456                       | 0.713                       |
| PCV13 3+1      |                                   |                                      |                                   |                                      |                             |                             |
| Serotype       | 0-2 years<br>GMC $\mu\text{g/ml}$ | %<br>$\geq 0.35$<br>$\mu\text{g/ml}$ | 4-6 years<br>GMC $\mu\text{g/ml}$ | %<br>$\geq 0.35$<br>$\mu\text{g/ml}$ | <i>P</i> value <sup>a</sup> | <i>P</i> value <sup>b</sup> |
| <b>3</b>       | 0.29 (0.21-0.40)                  | 36.8                                 | 0.27 (0.17-0.43)                  | 42.1                                 | 0.995                       | 0.357                       |
| <b>6A</b>      | 1.01 (0.69-1.46)                  | 78.9                                 | 0.54 (0.31-0.97)                  | 63.2                                 | 0.053                       | 0.195                       |
| <b>7F</b>      | 0.74 (0.55-1.00)                  | 81.6                                 | 0.52 (0.30-0.91)                  | 73.7                                 | <b>0.019</b>                | 0.934                       |
| <b>19A</b>     | 1.20 (0.87-1.64)                  | 89.5                                 | 2.64 (1.26-5.52)                  | 89.5                                 | <b>0.034</b>                | <b>0.043</b>                |
| <b>6b</b>      | 1.79 (1.21-2.67)                  | 90.0                                 | 0.83 (0.49-1.41)                  | 69.2                                 | <b>0.038</b>                | 0.226                       |
| <b>14</b>      | 2.88 (1.95-4.26)                  | 97.5                                 | 1.57 (0.96-2.59)                  | 96.2                                 | 0.114                       | <b>0.045</b>                |
| <b>19F</b>     | 1.36 (0.99-1.86)                  | 95.0                                 | 1.53 (0.88-2.67)                  | 92.3                                 | 0.618                       | 0.415                       |
| <b>23F</b>     | 1.36 (0.89-2.08)                  | 82.5                                 | 1.10 (0.61-1.98)                  | 80.8                                 | 0.319                       | 0.857                       |

GMCs were compared between the groups (0-2 years vs. 4-6 years) using a Mann-Whitney U test (a).

Proportion of children above threshold levels ( $0.35 \mu\text{g/ml}$ ) were compared between the groups (0-2 years vs. 4-6 years) using a chi-square test (b). Significant changes between two time points (0-2 years vs. 4-6 years) are in bold, *P* values  $< 0.05$  were regarded as statistically significant.
