# Supplementary material for: Persistence of immunity in children immunised with 13-valent pneumococcal conjugate vaccine and impact on nasopharyngeal carriage: a cross-sectional study
Source: PubMed Central journal article supplement — Thorax. 2020 May 22;75(8):689–92. doi: 10.1136/thoraxjnl-2019-213878 (PMC7402562; doi:10.1136/thoraxjnl-2019-213878), 2020-05-22
Supplement: thoraxjnl-2019-213878supp007.pdf [file thoraxjnl-2019-213878supp007.pdf]

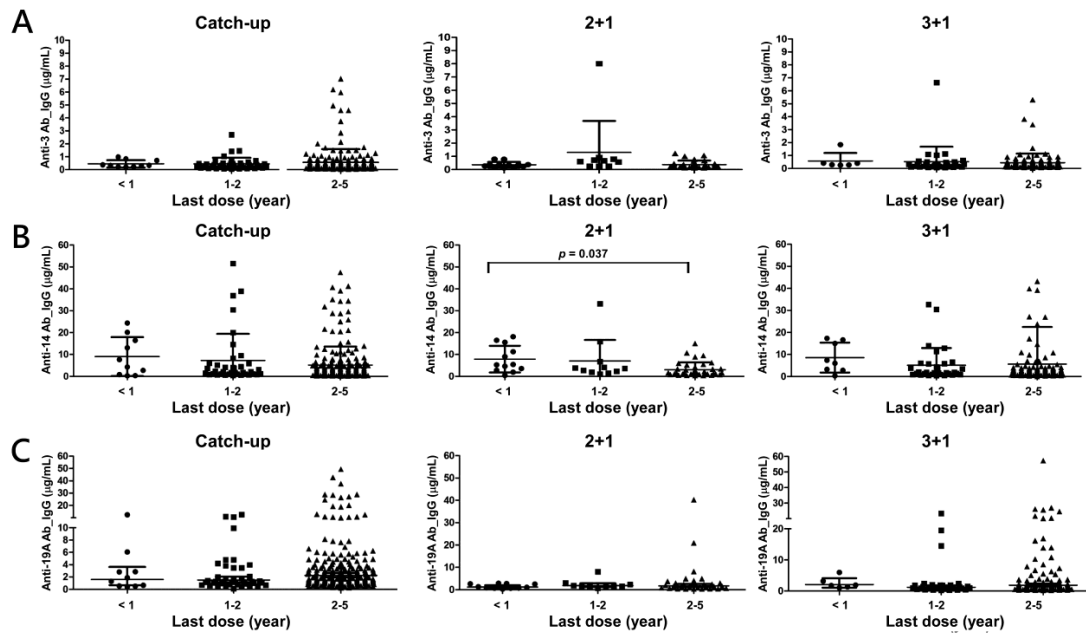

**Supplementary figure S3** Pneumococcal serotype-specific IgG (geometric mean concentrations with 95% Cis,  $\mu\text{g}/\text{mL}$ ) in children after PCV13 vaccination with catch-up (1-2 doses), 2+1, and 3+1 schedules. Three main study groups were further divided into three subgroups according to time since PCV13 vaccination, <1 year, 1-2 years, and 2-5 years.  $P$  values < 0.05 were regarded as statistically significant. Panels A, B, and C refer to serotypes 3, 14, and 19A, respectively.
