# Supplementary material for: Persistence of immunity in children immunised with 13-valent pneumococcal conjugate vaccine and impact on nasopharyngeal carriage: a cross-sectional study
Source: PubMed Central journal article supplement — Thorax. 2020 May 22;75(8):689–92. doi: 10.1136/thoraxjnl-2019-213878 (PMC7402562; doi:10.1136/thoraxjnl-2019-213878), 2020-05-22
Supplement: thoraxjnl-2019-213878supp008.pdf [file thoraxjnl-2019-213878supp008.pdf]

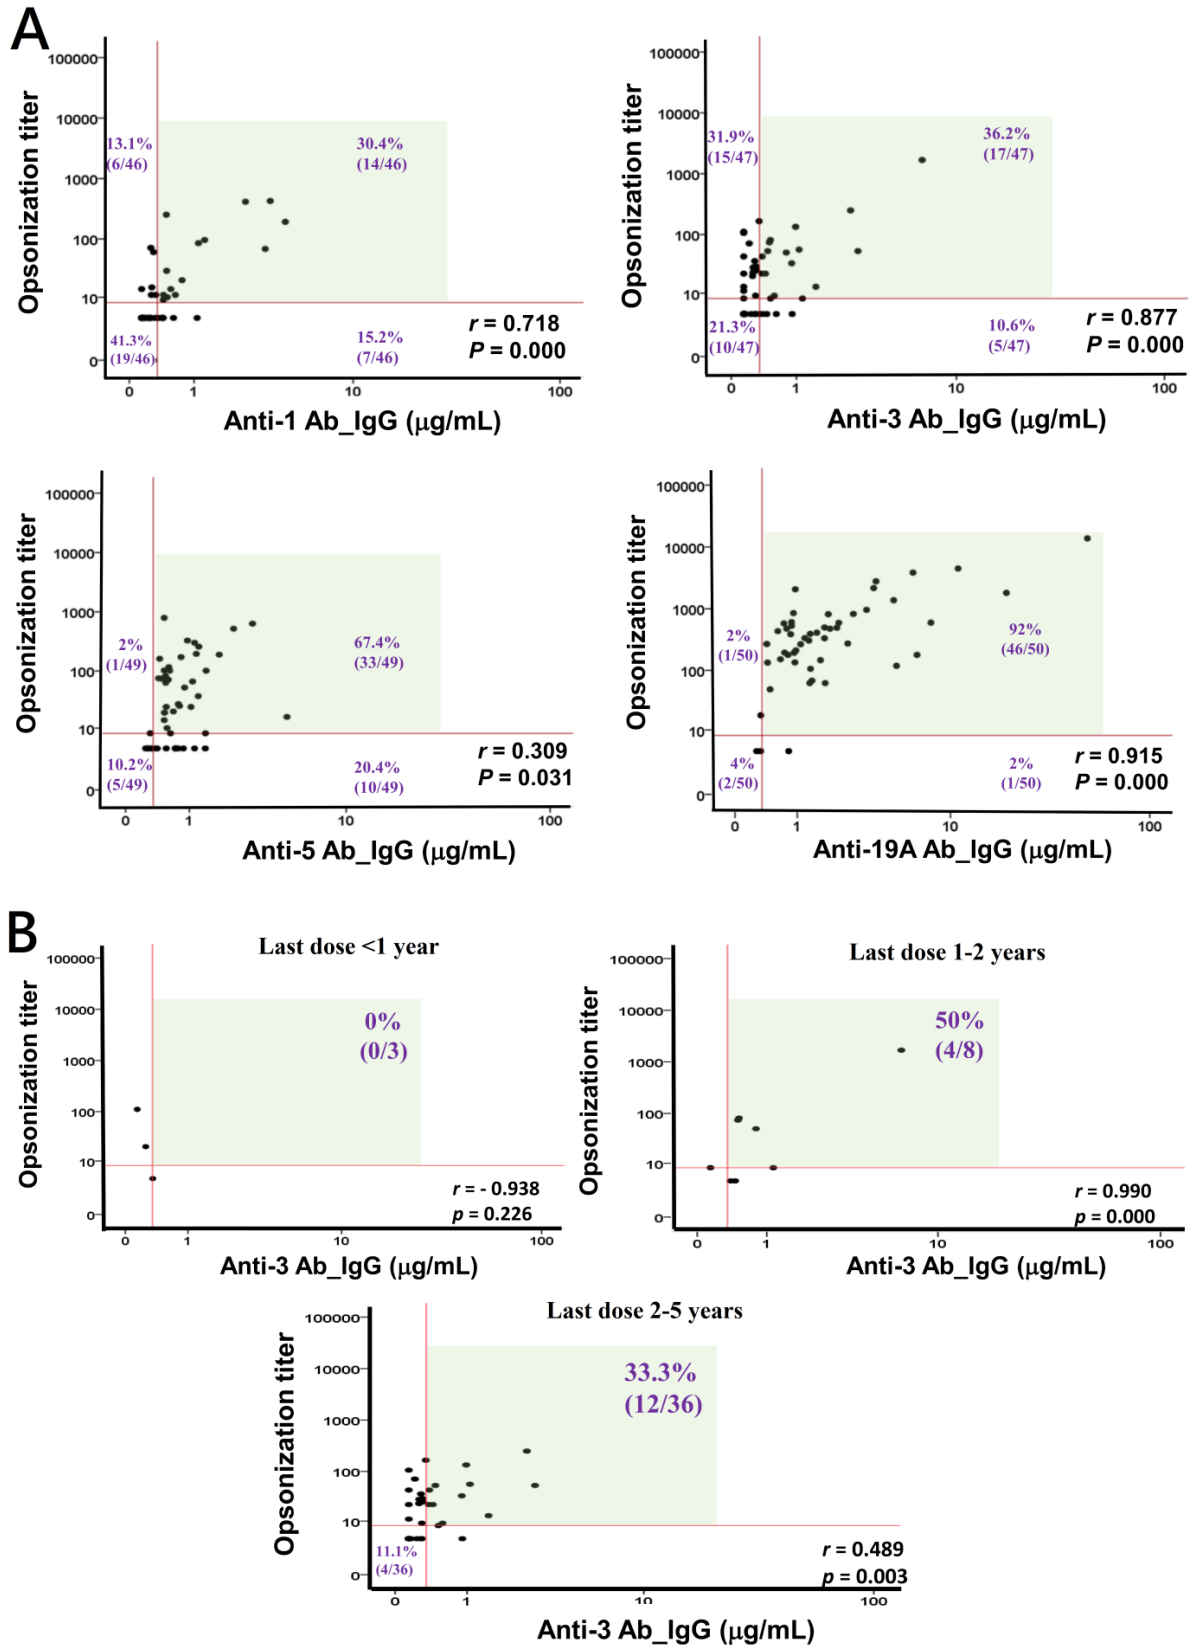

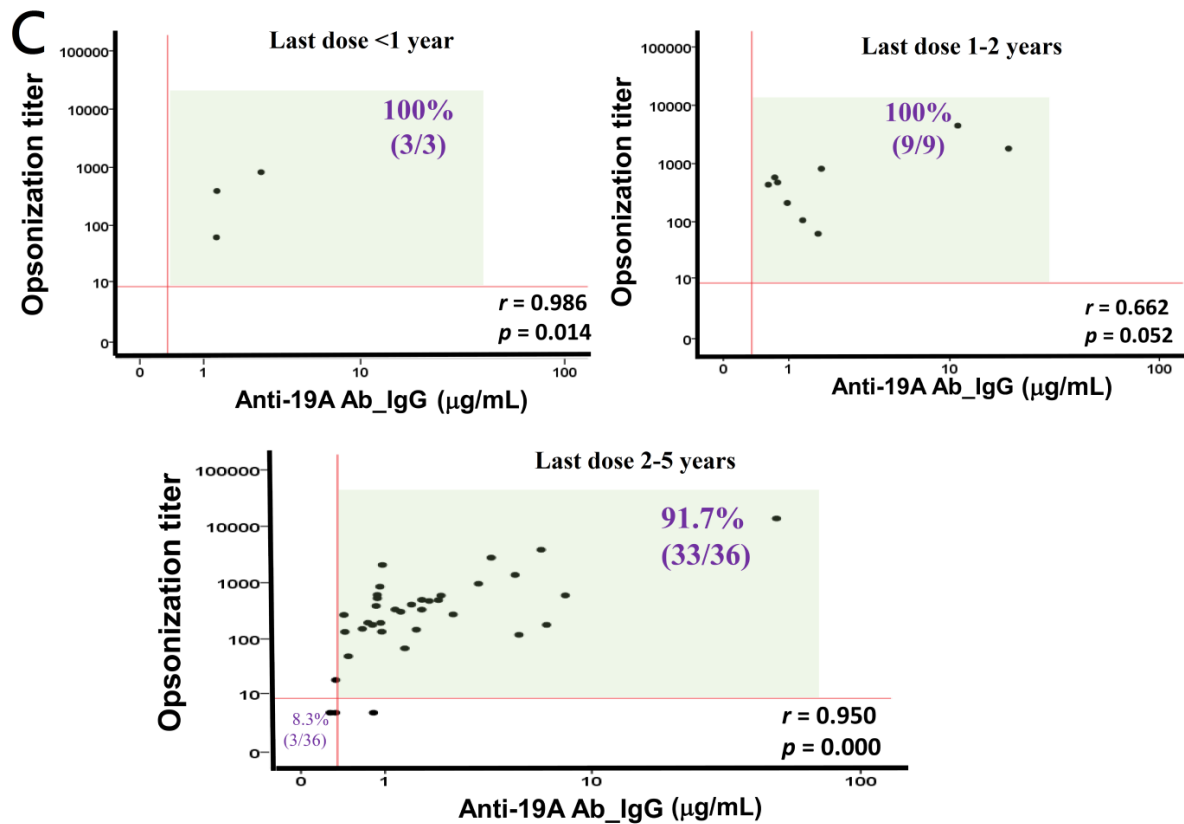

**Supplementary figure S4** Scatter plot-showing correlation between IgG antibody titers and OPA in children after PCV13 vaccination with catch-up (1-2 doses), 2+1, and 3+1 schedules. The individual titers are indicated by dots. Red lines indicate protective thresholds for IgG antibody ( $\geq 0.35 \mu\text{g/ml}$ ) and OPA titer ( $\geq 18$ ). Correlation coefficients were determined with the Pearson correlation test.  $r$ , Pearson correlation coefficient.  $P$  values  $< 0.05$  were regarded as statistically significant. Panel A shows the correlation for serotypes 1, 3, 5, and 19A. Panels B and C indicate the correlation for serotypes 3 and 19A by years after the last dose of PCV13 immunization.
